# Supplementary material
Source: publisher figshare collection journal article supplement (https://karger.figshare.com/ndownloader/files/21818202)
Supplement: Supplementary file 1 [file 21818202]

**Supporting information file**

**Title**: Employment in Myasthenia Gravis: a systematic literature review and meta-analysis.

**Authors**: Guastafierro Erika, Tramacere Irene, Toppo Claudia, Leonardi Matilde, Mantegazza Renato, Bonanno Silvia, Frangiamore Rita, Raggi Alberto

**Journal**: Neuroepidemiology

**Corresponding Author**: Erika Guastafierro. Neurology, Public Health and Disability Unit – Neurological Institute C. Besta IRCCS Foundation. e-mail: erika.guastafierro@istituto-besta.it

**Methods**

SEARCH STRATEGY MG & WORK 06/04/2019

TITLE-ABS-KEY ( myasthenia ) AND PUBYEAR > 1999

AND ( LIMIT-TO ( SRCTYPE,"j" ) )

AND ( LIMIT-TO ( DOCTYPE,"ar" ) OR LIMIT-TO ( DOCTYPE,"sh" ) )

AND ( EXCLUDE ( SUBJAREA,"BIOC" ) OR EXCLUDE ( SUBJAREA,"AGRI" ) OR EXCLUDE ( SUBJAREA,"VETE" ) OR EXCLUDE ( SUBJAREA,"CHEM" ) OR EXCLUDE ( SUBJAREA,"ENGI" ) OR EXCLUDE ( SUBJAREA,"CENG" ) OR EXCLUDE ( SUBJAREA,"ARTS" ) OR EXCLUDE ( SUBJAREA,"DENT" ) OR EXCLUDE ( SUBJAREA,"COMP" ) OR EXCLUDE ( SUBJAREA,"MATE" ) OR EXCLUDE ( SUBJAREA,"ENVI" ) OR EXCLUDE ( SUBJAREA,"PHYS" ) OR EXCLUDE ( SUBJAREA,"MATH" ) OR EXCLUDE ( SUBJAREA,"EART" ) OR EXCLUDE ( SUBJAREA,"BUSI" ) OR EXCLUDE ( SUBJAREA,"Undefined" ) )

AND ( LIMIT-TO ( LANGUAGE,"English" ) )

AND ( EXCLUDE ( EXACTKEYWORD,"Case Report" ) OR EXCLUDE ( EXACTKEYWORD,"Adolescent" ) OR EXCLUDE ( EXACTKEYWORD,"Child" ) OR EXCLUDE ( EXACTKEYWORD,"Nonhuman" ) OR EXCLUDE ( EXACTKEYWORD,"Human Tissue" ) OR EXCLUDE ( EXACTKEYWORD,"Aged, 80 And Over" ) OR EXCLUDE ( EXACTKEYWORD,"Animals" ) OR EXCLUDE ( EXACTKEYWORD,"Nuclear Magnetic Resonance Imaging" ) OR EXCLUDE ( EXACTKEYWORD,"Multiple Sclerosis" ) OR EXCLUDE ( EXACTKEYWORD,"Animal Experiment" ) OR EXCLUDE ( EXACTKEYWORD,"Guillain Barre Syndrome" ) OR EXCLUDE ( EXACTKEYWORD,"Animal Model" ) OR EXCLUDE ( EXACTKEYWORD,"Systemic Lupus Erythematosus" ) OR EXCLUDE ( EXACTKEYWORD,"Human Cell" ) OR EXCLUDE ( EXACTKEYWORD,"Child, Preschool" ) OR EXCLUDE ( EXACTKEYWORD,"Antibody Titer" ) OR EXCLUDE ( EXACTKEYWORD,"Protein Expression" ) OR EXCLUDE ( EXACTKEYWORD,"Mouse" ) OR EXCLUDE ( EXACTKEYWORD,"Rheumatoid Arthritis" ) OR EXCLUDE ( EXACTKEYWORD,"School Child" ) OR EXCLUDE ( EXACTKEYWORD,"Preschool Child" ) OR EXCLUDE ( EXACTKEYWORD,"Infant" ) OR EXCLUDE ( EXACTKEYWORD,"Immunohistochemistry" ) OR EXCLUDE ( EXACTKEYWORD,"Genetics" ) OR EXCLUDE ( EXACTKEYWORD,"Very Elderly" ) OR EXCLUDE ( EXACTKEYWORD,"Animal Cell" ) OR EXCLUDE ( EXACTKEYWORD,"Mice" ) OR EXCLUDE ( EXACTKEYWORD,"Animal Tissue" ) OR EXCLUDE ( EXACTKEYWORD,"Myasthenia Gravis, Autoimmune, Experimental" ) OR EXCLUDE ( EXACTKEYWORD,"Mycophenolic Acid 2 Morpholinoethyl Ester" ) OR EXCLUDE ( EXACTKEYWORD,"Cancer Staging" ) OR EXCLUDE ( EXACTKEYWORD,"Neuromuscular Transmission" ) OR EXCLUDE ( EXACTKEYWORD,"Eaton Lambert Syndrome" ) OR EXCLUDE ( EXACTKEYWORD,"Animal" ) OR EXCLUDE ( EXACTKEYWORD,"Rat" ) OR EXCLUDE ( EXACTKEYWORD,"Genotype" ) OR EXCLUDE ( EXACTKEYWORD,"Mortality" ) )

**Results**

Forest plots of variables taken into consideration for each study and sub-groups with counting for the number of the populations included (n=).

**Figure S1.** Forest plot by gender [women ≥59% (n=633) and women <59% (n=1507)]

*Note: Estimated Proportion (ES) of workers.*

**Figure S2**. Forest plot by age [age ≥48 years and age <48 years]

*Note: Estimated Proportion (ES) of workers.*

**Figure S3.1**. Forest plot by educational level. Primary and Secondary education [up to secondary school ≥29% (n=1282) and up to secondary school < 29% (n=187)]

*Note: Estimated Proportion (ES) of workers.*

**Figure S3.2**. Forest plot by educational level. Upper school education [high school <42% (n=615) and high school ≥42% (n=353)]

*Note: Estimated Proportion (ES) of workers.*

**Figure S3.3**. Forest plot by educational level. University [university degree <22% (n=114) and university degree ≥22% (n=429)]

*Note: Estimated Proportion (ES) of workers.*

**Figure S4**. Forest plot by Symptoms duration [Symptoms duration ≥8.85 years and symptoms duration < 8.85 years]

*Note: Estimated Proportion (ES) of workers.*

**Figure S5**. Forest plot by Thymectomy [Thymectomy ≥48% (n=1128) and thymectomy <48% (n=318)]

*Note: Estimated Proportion (ES) of workers.*

**Figure 6.1.** Forest plot by treatment. Pyridostigmine drugs [pyridostigmine drugs <81% (n=493) and pyridostigmine drugs ≥81% (n=2045)]

*Note: Estimated Proportion (ES) of workers.*

**Figure 6.2**. Forest plot by treatment. Steroids drugs [steroids drugs <57% (n=1166) and steroids drugs ≥57% (n=412)]

*Note: Estimated Proportion (ES) of workers.*

**Figure 6.3**. Forest plot by treatment. Immunosuppressive drugs [immunosuppressive drugs <46% (n=285) and immunosuppressive drugs ≥46% (n=1839)]

*Note: Estimated Proportion (ES) of workers.*

**Figure 7.1**. Forest plot by symptoms. No Symptoms [no symptoms <25% (n=49) and no symptoms ≥25% (n=167)]

*Note: Estimated Proportion (ES) of workers.*

**Figure 7.2**. Forest plot by symptoms. Ocular symptoms [ocular symptoms ≥22% (n=289) and ocular symptom <22% (n=123)]

*Note: Estimated Proportion (ES) of workers.*

**Figure 7.3**. Forest plot by symptoms. Generalized, bulbar or respiratory symptoms [GBR <61% (n=388) and GBR ≥61% (n=632)]

*Note: Estimated Proportion (ES) of workers.*
